# Supplementary material for: Identification of exosomal miRNAs associated with the anthracycline-induced liver injury in postoperative breast cancer patients by small RNA sequencing
Source: PeerJ. 2020 Apr 24;8:e9021. doi: 10.7717/peerj.9021 (PMC7185038; doi:10.7717/peerj.9021)
Supplement: Table S1 — The results of GO annotation and KEGG pathway enrichment analysis. [file peerj-08-9021-s001.xlsx]

## Sheet: targets of upregulated miRNA
Common elements in List 1 List 2 :
UNC93B1
ANXA2
IGF1
TAGLN2
CAP1
PNP
IL6
PLS3
ECHS1
IL11
ACTN4
HMOX1
NR5A2
RGN
CA3
S100A11
GSTO1
FADS1
BAX
CXCL1
ABCC1
CCL2
ARG1
ACTB
FASN
DNAJB9
SESN2
MAT1A
TMEM117
PTGES2
HMGB1
ERN1
CCT5
ECHDC1
SUOX
F2RL3
PNRC1
ZDHHC23
RDH13
HAVCR1
OCIAD1
CPS1
SOD2
CCDC80
VEGFA
ABCC2
TGFBR1
ABCB1
CTNNB1
ALDH9A1
CANX
C3
CDS1
CHRM3
PDLIM5

## Sheet: enrichment analysis of up
Category	Term	Count	%	PValue	Genes	List Total	Pop Hits	Pop Total	Fold Enrichment	Bonferroni	Benjamini	FDR
GOTERM_CC_DIRECT	GO:0070062~extracellular exosome	22	40	2.44632e-05	ACTB, ACTN4, C3, ECHDC1, S100A11, ECHS1, ABCB1, TAGLN2, PNP, CANX, ANXA2, SOD2, CTNNB1, ARG1, CCT5, DNAJB9, BAX, FASN, ABCC1, GSTO1, CAP1, ALDH9A1	55	2811	18224	2.59324	0.0037603	0.0037603	0.0293422
GOTERM_BP_DIRECT	GO:0042493~response to drug	8	14.5455	3.95902e-05	ARG1, IL6, ABCC1, ABCB1, CPS1, PNP, CTNNB1, SOD2	53	304	16792	8.33764	0.0386273	0.0386273	0.0624932
GOTERM_BP_DIRECT	GO:0043410~positive regulation of MAPK cascade	5	9.09091	0.000114059	HMGB1, IL6, IGF1, CTNNB1, IL11	53	81	16792	19.5574	0.107292	0.0551677	0.179944
GOTERM_CC_DIRECT	GO:0005615~extracellular space	14	25.4545	0.000117473	ACTB, CXCL1, HMGB1, IL6, CCL2, ACTN4, C3, S100A11, IGF1, ANXA2, IL11, ARG1, HMOX1, VEGFA	55	1347	18224	3.44383	0.0179292	0.00900512	0.140829
GOTERM_BP_DIRECT	GO:0043200~response to amino acid	4	7.27273	0.000118422	ARG1, IL6, CCL2, CPS1	53	31	16792	40.8813	0.111159	0.0385175	0.18682
GOTERM_BP_DIRECT	GO:0007568~aging	6	10.9091	0.000154285	ARG1, IL6, CCL2, FADS1, RGN, CANX	53	165	16792	11.5211	0.142321	0.0376541	0.243332
GOTERM_BP_DIRECT	GO:0051272~positive regulation of cellular component movement	3	5.45455	0.000416589	ACTN4, TGFBR1, VEGFA	53	10	16792	95.0491	0.33939	0.0795738	0.655755
GOTERM_BP_DIRECT	GO:0009408~response to heat	4	7.27273	0.000439064	IL6, CCL2, IGF1, ABCC2	53	48	16792	26.4025	0.354006	0.0702388	0.691019
GOTERM_BP_DIRECT	GO:0001938~positive regulation of endothelial cell proliferation	4	7.27273	0.00127055	ARG1, CCL2, TGFBR1, VEGFA	53	69	16792	18.367	0.71776	0.165326	1.9874
GOTERM_BP_DIRECT	GO:0001935~endothelial cell proliferation	3	5.45455	0.00139411	HMGB1, HMOX1, ERN1	53	18	16792	52.805	0.750454	0.159294	2.1787
GOTERM_MF_DIRECT	GO:0008083~growth factor activity	5	9.09091	0.00165999	CXCL1, IL6, VEGFA, IGF1, IL11	54	162	16881	9.64849	0.318717	0.318717	2.10887
GOTERM_BP_DIRECT	GO:0001666~response to hypoxia	5	9.09091	0.00196222	CCL2, ACTN4, HMOX1, VEGFA, SOD2	53	172	16792	9.21018	0.858341	0.195189	3.05372
GOTERM_BP_DIRECT	GO:0050731~positive regulation of peptidyl-tyrosine phosphorylation	4	7.27273	0.00208769	IL6, VEGFA, IGF1, IL11	53	82	16792	15.4551	0.874997	0.187746	3.24598
GOTERM_MF_DIRECT	GO:0098641~cadherin binding involved in cell-cell adhesion	6	10.9091	0.00211455	PDLIM5, FASN, S100A11, TAGLN2, ANXA2, CTNNB1	54	290	16881	6.46782	0.386747	0.216895	2.67914
GOTERM_BP_DIRECT	GO:0001822~kidney development	4	7.27273	0.00239165	TGFBR1, BAX, VEGFA, RGN	53	86	16792	14.7363	0.907685	0.194744	3.71027
GOTERM_CC_DIRECT	GO:0005913~cell-cell adherens junction	6	10.9091	0.00263476	PDLIM5, FASN, S100A11, TAGLN2, ANXA2, CTNNB1	55	323	18224	6.15502	0.333882	0.126659	3.11528
GOTERM_BP_DIRECT	GO:0048678~response to axon injury	3	5.45455	0.0031418	ARG1, BAX, SOD2	53	27	16792	35.2034	0.956326	0.229655	4.84717
GOTERM_MF_DIRECT	GO:0016491~oxidoreductase activity	5	9.09091	0.00355837	SUOX, FADS1, FASN, GSTO1, RDH13	54	200	16881	7.81528	0.561085	0.240035	4.47028
GOTERM_BP_DIRECT	GO:0071549~cellular response to dexamethasone stimulus	3	5.45455	0.00361976	ARG1, IL6, CCL2	53	29	16792	32.7755	0.972899	0.242365	5.56499
GOTERM_BP_DIRECT	GO:0045765~regulation of angiogenesis	3	5.45455	0.00412943	IL6, HMOX1, CTNNB1	53	31	16792	30.661	0.983711	0.254792	6.32485
GOTERM_BP_DIRECT	GO:0010332~response to gamma radiation	3	5.45455	0.00412943	CCL2, BAX, SOD2	53	31	16792	30.661	0.983711	0.254792	6.32485
GOTERM_CC_DIRECT	GO:0005768~endosome	5	9.09091	0.00441488	HMGB1, TGFBR1, UNC93B1, OCIAD1, ANXA2	55	225	18224	7.36323	0.49409	0.15663	5.16941
GOTERM_BP_DIRECT	GO:0043491~protein kinase B signaling	3	5.45455	0.00467042	CCL2, IGF1, SESN2	53	33	16792	28.8027	0.990514	0.266942	7.12511
GOTERM_CC_DIRECT	GO:0005739~mitochondrion	11	20	0.00519482	SUOX, PTGES2, FADS1, BAX, FASN, ERN1, ECHS1, SESN2, OCIAD1, RDH13, SOD2	55	1331	18224	2.73839	0.551608	0.148212	6.05677
GOTERM_BP_DIRECT	GO:0010043~response to zinc ion	3	5.45455	0.00553975	ARG1, CPS1, SOD2	53	36	16792	26.4025	0.996024	0.292106	8.3977
GOTERM_CC_DIRECT	GO:0005576~extracellular region	12	21.8182	0.00678759	CXCL1, F2RL3, HMGB1, IL6, CCL2, ACTN4, C3, VEGFA, RGN, IGF1, PNP, IL11	55	1610	18224	2.46966	0.64966	0.160382	7.8453
KEGG_PATHWAY	hsa04520:Adherens junction	4	7.27273	0.00686363	ACTB, ACTN4, TGFBR1, CTNNB1	39	71	6879	9.93716	0.644096	0.644096	7.89544
GOTERM_BP_DIRECT	GO:0043524~negative regulation of neuron apoptotic process	4	7.27273	0.0079249	CCL2, HMOX1, BAX, SOD2	53	132	16792	9.60091	0.999635	0.372297	11.8059
GOTERM_MF_DIRECT	GO:0042626~ATPase activity, coupled to transmembrane movement of substances	3	5.45455	0.00840967	ABCC1, ABCB1, ABCC2	54	44	16881	21.3144	0.857847	0.38597	10.2683
GOTERM_BP_DIRECT	GO:0007165~signal transduction	10	18.1818	0.00867564	CXCL1, F2RL3, CCL2, CHRM3, C3, TGFBR1, S100A11, IGF1, CAP1, CDS1	53	1161	16792	2.72894	0.999828	0.382244	12.8538
GOTERM_BP_DIRECT	GO:0008630~intrinsic apoptotic signaling pathway in response to DNA damage	3	5.45455	0.00930162	HMOX1, BAX, SOD2	53	47	16792	20.2232	0.999908	0.387	13.7186
GOTERM_BP_DIRECT	GO:0055114~oxidation-reduction process	7	12.7273	0.00962748	PTGES2, FADS1, FASN, GSTO1, ALDH9A1, RDH13, SOD2	53	592	16792	3.7463	0.999934	0.382013	14.1656
GOTERM_BP_DIRECT	GO:0098609~cell-cell adhesion	5	9.09091	0.00979028	PDLIM5, FASN, S100A11, TAGLN2, ANXA2	53	271	16792	5.84558	0.999944	0.372592	14.3882
GOTERM_CC_DIRECT	GO:0043209~myelin sheath	4	7.27273	0.0103421	ACTB, CCT5, CANX, SOD2	55	152	18224	8.71962	0.798299	0.204441	11.7247
GOTERM_CC_DIRECT	GO:0016020~membrane	14	25.4545	0.0105159	ACTB, TGFBR1, PDLIM5, FADS1, ABCB1, OCIAD1, CANX, ANXA2, CTNNB1, BAX, HMOX1, VEGFA, FASN, ABCC1	55	2200	18224	2.10856	0.803683	0.184132	11.9105
GOTERM_CC_DIRECT	GO:0005783~endoplasmic reticulum	8	14.5455	0.0107462	TMEM117, DNAJB9, HMOX1, BAX, UNC93B1, ERN1, CDS1, CANX	55	828	18224	3.20141	0.810596	0.168792	12.1562
GOTERM_CC_DIRECT	GO:0031093~platelet alpha granule lumen	3	5.45455	0.0115752	ACTN4, VEGFA, IGF1	55	55	18224	18.0734	0.833536	0.164143	13.0351
GOTERM_BP_DIRECT	GO:0035900~response to isolation stress	2	3.63636	0.0123305	FADS1, SOD2	53	4	16792	158.415	0.999996	0.429443	17.7909
GOTERM_BP_DIRECT	GO:0010574~regulation of vascular endothelial growth factor production	2	3.63636	0.0123305	IL6, CCL2	53	4	16792	158.415	0.999996	0.429443	17.7909
KEGG_PATHWAY	hsa05323:Rheumatoid arthritis	4	7.27273	0.0123577	IL6, CCL2, VEGFA, IL11	39	88	6879	8.01748	0.845135	0.606471	13.7992
GOTERM_MF_DIRECT	GO:0001882~nucleoside binding	2	3.63636	0.0125006	ACTN4, PNP	54	4	16881	156.306	0.945297	0.440755	14.9035
GOTERM_CC_DIRECT	GO:0005829~cytosol	18	32.7273	0.0127976	ACTB, PTGES2, PDLIM5, ECHDC1, SESN2, PNP, ANXA2, CTNNB1, ARG1, CCT5, MAT1A, BAX, HMOX1, FASN, RGN, CA3, GSTO1, ALDH9A1	55	3315	18224	1.79916	0.862419	0.164999	14.3166
GOTERM_CC_DIRECT	GO:0005789~endoplasmic reticulum membrane	8	14.5455	0.0131998	DNAJB9, FADS1, HMOX1, BAX, UNC93B1, ERN1, CDS1, CANX	55	862	18224	3.07513	0.870789	0.156779	14.7345
GOTERM_BP_DIRECT	GO:0043065~positive regulation of apoptotic process	5	9.09091	0.0138023	HMGB1, IL6, HMOX1, BAX, CTNNB1	53	300	16792	5.2805	0.999999	0.451878	19.704
GOTERM_BP_DIRECT	GO:0050679~positive regulation of epithelial cell proliferation	3	5.45455	0.0148459	IL6, VEGFA, IGF1	53	60	16792	15.8415	1	0.462109	21.0352
GOTERM_BP_DIRECT	GO:0045669~positive regulation of osteoblast differentiation	3	5.45455	0.0148459	IL6, IGF1, CTNNB1	53	60	16792	15.8415	1	0.462109	21.0352
GOTERM_BP_DIRECT	GO:0048661~positive regulation of smooth muscle cell proliferation	3	5.45455	0.0148459	IL6, HMOX1, IGF1	53	60	16792	15.8415	1	0.462109	21.0352
GOTERM_BP_DIRECT	GO:1900103~positive regulation of endoplasmic reticulum unfolded protein response	2	3.63636	0.0153898	BAX, ERN1	53	5	16792	126.732	1	0.460588	21.7208
KEGG_PATHWAY	hsa04066:HIF-1 signaling pathway	4	7.27273	0.0156118	IL6, HMOX1, VEGFA, IGF1	39	96	6879	7.34936	0.905602	0.544676	17.1303
GOTERM_CC_DIRECT	GO:0016323~basolateral plasma membrane	4	7.27273	0.01626	CHRM3, ABCC1, ANXA2, CTNNB1	55	180	18224	7.36323	0.919911	0.176508	17.8528
GOTERM_BP_DIRECT	GO:0070374~positive regulation of ERK1 and ERK2 cascade	4	7.27273	0.0169266	HMGB1, IL6, CCL2, VEGFA	53	175	16792	7.24183	1	0.479681	23.6279
GOTERM_MF_DIRECT	GO:0005125~cytokine activity	4	7.27273	0.017828	HMGB1, IL6, VEGFA, IL11	54	176	16881	7.1048	0.984321	0.499712	20.609
GOTERM_BP_DIRECT	GO:0032868~response to insulin	3	5.45455	0.0182918	IL6, FADS1, SESN2	53	67	16792	14.1864	1	0.493549	25.2854
GOTERM_BP_DIRECT	GO:0010042~response to manganese ion	2	3.63636	0.0184397	ARG1, SOD2	53	6	16792	105.61	1	0.483865	25.463
KEGG_PATHWAY	hsa05142:Chagas disease (American trypanosomiasis)	4	7.27273	0.0193068	IL6, CCL2, C3, TGFBR1	39	104	6879	6.78402	0.9463	0.518614	20.7696
GOTERM_BP_DIRECT	GO:0030335~positive regulation of cell migration	4	7.27273	0.0193141	ACTN4, TGFBR1, VEGFA, IGF1	53	184	16792	6.88761	1	0.487859	26.5045
KEGG_PATHWAY	hsa05200:Pathways in cancer	7	12.7273	0.0195179	F2RL3, IL6, TGFBR1, BAX, VEGFA, IGF1, CTNNB1	39	393	6879	3.14171	0.948006	0.446407	20.973
GOTERM_BP_DIRECT	GO:0033138~positive regulation of peptidyl-serine phosphorylation	3	5.45455	0.0198624	IL6, VEGFA, IL11	53	70	16792	13.5784	1	0.485932	27.1506
GOTERM_BP_DIRECT	GO:0030855~epithelial cell differentiation	3	5.45455	0.0198624	VEGFA, TAGLN2, NR5A2	53	70	16792	13.5784	1	0.485932	27.1506
GOTERM_BP_DIRECT	GO:0048010~vascular endothelial growth factor receptor signaling pathway	3	5.45455	0.0209398	ACTB, CCL2, VEGFA	53	72	16792	13.2013	1	0.492997	28.4049
GOTERM_BP_DIRECT	GO:0045893~positive regulation of transcription, DNA-templated	6	10.9091	0.0211787	IL6, PTGES2, TGFBR1, IGF1, NR5A2, CTNNB1	53	515	16792	3.69123	1	0.486034	28.6801
GOTERM_BP_DIRECT	GO:2000427~positive regulation of apoptotic cell clearance	2	3.63636	0.0214804	CCL2, C3	53	7	16792	90.5229	1	0.480415	29.0265
GOTERM_BP_DIRECT	GO:0060982~coronary artery morphogenesis	2	3.63636	0.0214804	TGFBR1, VEGFA	53	7	16792	90.5229	1	0.480415	29.0265
GOTERM_CC_DIRECT	GO:0009986~cell surface	6	10.9091	0.0218392	HMGB1, TGFBR1, VEGFA, ABCB1, ABCC2, ANXA2	55	542	18224	3.66803	0.966643	0.215645	23.2707
GOTERM_BP_DIRECT	GO:0030324~lung development	3	5.45455	0.0231663	ARG1, HMGB1, VEGFA	53	76	16792	12.5065	1	0.496379	30.9328
GOTERM_MF_DIRECT	GO:0008144~drug binding	3	5.45455	0.0237713	CHRM3, FASN, PNP	54	76	16881	12.3399	0.996142	0.547934	26.5564
GOTERM_MF_DIRECT	GO:0005509~calcium ion binding	7	12.7273	0.0242398	ACTN4, S100A11, RGN, CPS1, CANX, PLS3, ANXA2	54	717	16881	3.05199	0.996547	0.507641	27.0073
KEGG_PATHWAY	hsa02010:ABC transporters	3	5.45455	0.0242974	ABCC1, ABCB1, ABCC2	39	44	6879	12.0262	0.975019	0.459325	25.4526
GOTERM_BP_DIRECT	GO:0010269~response to selenium ion	2	3.63636	0.0245119	ARG1, SOD2	53	8	16792	79.2075	1	0.506149	32.4199
GOTERM_BP_DIRECT	GO:0006987~activation of signaling protein activity involved in unfolded protein response	2	3.63636	0.0245119	BAX, ERN1	53	8	16792	79.2075	1	0.506149	32.4199
KEGG_PATHWAY	hsa04510:Focal adhesion	5	9.09091	0.0260307	ACTB, ACTN4, VEGFA, IGF1, CTNNB1	39	206	6879	4.28118	0.980867	0.431747	27.0187
GOTERM_MF_DIRECT	GO:0042803~protein homodimerization activity	7	12.7273	0.0261895	ACTN4, HMOX1, BAX, VEGFA, FASN, ERN1, S100A11	54	730	16881	2.99764	0.997824	0.493969	28.8565
GOTERM_BP_DIRECT	GO:0035767~endothelial cell chemotaxis	2	3.63636	0.0275341	HMGB1, VEGFA	53	9	16792	70.4067	1	0.537767	35.6512
GOTERM_BP_DIRECT	GO:0071243~cellular response to arsenic-containing substance	2	3.63636	0.0275341	HMOX1, GSTO1	53	9	16792	70.4067	1	0.537767	35.6512
KEGG_PATHWAY	hsa04015:Rap1 signaling pathway	5	9.09091	0.0276915	ACTB, F2RL3, VEGFA, IGF1, CTNNB1	39	210	6879	4.19963	0.985188	0.409355	28.491
KEGG_PATHWAY	hsa01212:Fatty acid metabolism	3	5.45455	0.0285756	FADS1, FASN, ECHS1	39	48	6879	11.024	0.987077	0.383192	29.2636
GOTERM_BP_DIRECT	GO:0006954~inflammatory response	5	9.09091	0.0295666	CXCL1, HMGB1, IL6, CCL2, C3	53	379	16792	4.17982	1	0.553847	37.7422
GOTERM_BP_DIRECT	GO:0046888~negative regulation of hormone secretion	2	3.63636	0.0305472	IL6, IL11	53	10	16792	63.366	1	0.556175	38.7281
GOTERM_BP_DIRECT	GO:0033160~positive regulation of protein import into nucleus, translocation	2	3.63636	0.0305472	IL6, IGF1	53	10	16792	63.366	1	0.556175	38.7281
GOTERM_BP_DIRECT	GO:0001525~angiogenesis	4	7.27273	0.031716	CCL2, HMOX1, VEGFA, ANXA2	53	223	16792	5.68305	1	0.560569	39.8842
GOTERM_CC_DIRECT	GO:0043005~neuron projection	4	7.27273	0.0331447	ARG1, HMGB1, ACTN4, PDLIM5	55	237	18224	5.59233	0.994432	0.292524	33.2584
GOTERM_BP_DIRECT	GO:0014075~response to amine	2	3.63636	0.0335511	ARG1, CPS1	53	11	16792	57.6055	1	0.572117	41.6581
GOTERM_CC_DIRECT	GO:0043234~protein complex	5	9.09091	0.0335541	ACTB, ACTN4, CPS1, CANX, CTNNB1	55	412	18224	4.02118	0.994784	0.279997	33.5967
GOTERM_BP_DIRECT	GO:0008285~negative regulation of cell proliferation	5	9.09091	0.033947	CXCL1, IL6, S100A11, CTNNB1, SOD2	53	396	16792	4.00038	1	0.567487	42.0343
GOTERM_MF_DIRECT	GO:0043225~anion transmembrane-transporting ATPase activity	2	3.63636	0.0340087	ABCC1, ABCC2	54	11	16881	56.8384	0.999662	0.550343	35.847
GOTERM_MF_DIRECT	GO:0070411~I-SMAD binding	2	3.63636	0.0340087	TGFBR1, CTNNB1	54	11	16881	56.8384	0.999662	0.550343	35.847
KEGG_PATHWAY	hsa05134:Legionellosis	3	5.45455	0.0355113	CXCL1, IL6, C3	39	54	6879	9.79915	0.995589	0.418624	35.0646
GOTERM_CC_DIRECT	GO:0042470~melanosome	3	5.45455	0.0361104	FASN, CANX, ANXA2	55	101	18224	9.84194	0.996531	0.283351	35.6733
GOTERM_CC_DIRECT	GO:0048471~perinuclear region of cytoplasm	6	10.9091	0.0363148	PTGES2, CCL2, ACTN4, HMOX1, ANXA2, CTNNB1	55	621	18224	3.20141	0.996642	0.271287	35.8367
GOTERM_BP_DIRECT	GO:0000050~urea cycle	2	3.63636	0.0365459	ARG1, CPS1	53	12	16792	52.805	1	0.586049	44.4482
KEGG_PATHWAY	hsa04068:FoxO signaling pathway	4	7.27273	0.0371411	IL6, TGFBR1, IGF1, SOD2	39	134	6879	5.26521	0.996577	0.403165	36.3629
KEGG_PATHWAY	hsa04621:NOD-like receptor signaling pathway	3	5.45455	0.0379547	CXCL1, IL6, CCL2	39	56	6879	9.44918	0.996985	0.383485	37.002
GOTERM_MF_DIRECT	GO:0044548~S100 protein binding	2	3.63636	0.040069	S100A11, ANXA2	54	13	16881	48.094	0.999921	0.576318	40.8232
GOTERM_BP_DIRECT	GO:0002576~platelet degranulation	3	5.45455	0.0405083	ACTN4, VEGFA, IGF1	53	103	16792	9.22806	1	0.615901	47.9479
GOTERM_BP_DIRECT	GO:0006955~immune response	5	9.09091	0.0410474	CXCL1, IL6, CCL2, C3, PNP	53	421	16792	3.76283	1	0.612414	48.4078
GOTERM_BP_DIRECT	GO:1901224~positive regulation of NIK/NF-kappaB signaling	2	3.63636	0.0425082	HMGB1, ACTN4	53	14	16792	45.2615	1	0.617285	49.6349
KEGG_PATHWAY	hsa04060:Cytokine-cytokine receptor interaction	5	9.09091	0.0438199	CXCL1, IL6, CCL2, TGFBR1, IL11	39	243	6879	3.62931	0.998795	0.40371	41.4386
GOTERM_BP_DIRECT	GO:0006979~response to oxidative stress	3	5.45455	0.0456055	HMOX1, CA3, ABCC2	53	110	16792	8.64082	1	0.63566	52.1467
KEGG_PATHWAY	hsa05210:Colorectal cancer	3	5.45455	0.0456566	TGFBR1, BAX, CTNNB1	39	62	6879	8.53474	0.999097	0.393892	42.7678
GOTERM_MF_DIRECT	GO:0005161~platelet-derived growth factor receptor binding	2	3.63636	0.046092	VEGFA, ERN1	54	15	16881	41.6815	0.999982	0.596819	45.4138
GOTERM_BP_DIRECT	GO:0071222~cellular response to lipopolysaccharide	3	5.45455	0.0478591	ARG1, IL6, CCL2	53	113	16792	8.41142	1	0.645921	53.9001
GOTERM_BP_DIRECT	GO:2001234~negative regulation of apoptotic signaling pathway	2	3.63636	0.0484342	BAX, CTNNB1	53	16	16792	39.6038	1	0.642682	54.3378
GOTERM_BP_DIRECT	GO:0090026~positive regulation of monocyte chemotaxis	2	3.63636	0.0484342	HMGB1, CCL2	53	16	16792	39.6038	1	0.642682	54.3378
GOTERM_BP_DIRECT	GO:0045766~positive regulation of angiogenesis	3	5.45455	0.049384	C3, HMOX1, VEGFA	53	115	16792	8.26514	1	0.642423	55.0521
KEGG_PATHWAY	hsa05166:HTLV-I infection	5	9.09091	0.0501708	IL6, TGFBR1, BAX, CANX, CTNNB1	39	254	6879	3.47214	0.999557	0.402339	45.9183
GOTERM_BP_DIRECT	GO:0032331~negative regulation of chondrocyte differentiation	2	3.63636	0.0513838	TGFBR1, CTNNB1	53	17	16792	37.2741	1	0.649973	56.5221
GOTERM_BP_DIRECT	GO:0043066~negative regulation of apoptotic process	5	9.09091	0.0519703	IL6, VEGFA, RGN, IGF1, SOD2	53	455	16792	3.48165	1	0.646979	56.9447
KEGG_PATHWAY	hsa04115:p53 signaling pathway	3	5.45455	0.0524773	BAX, IGF1, SESN2	39	67	6879	7.89782	0.999692	0.396708	47.4659
GOTERM_BP_DIRECT	GO:0042462~eye photoreceptor cell development	2	3.63636	0.0543244	VEGFA, RDH13	53	18	16792	35.2034	1	0.656571	58.6021
GOTERM_BP_DIRECT	GO:0033189~response to vitamin A	2	3.63636	0.0543244	ARG1, FADS1	53	18	16792	35.2034	1	0.656571	58.6021
GOTERM_BP_DIRECT	GO:0008284~positive regulation of cell proliferation	5	9.09091	0.0558163	IL6, TGFBR1, VEGFA, IGF1, IL11	53	466	16792	3.39947	1	0.65981	59.6214
GOTERM_BP_DIRECT	GO:0006855~drug transmembrane transport	2	3.63636	0.057256	ABCB1, ABCC2	53	19	16792	33.3505	1	0.662571	60.5826
GOTERM_BP_DIRECT	GO:0001934~positive regulation of protein phosphorylation	3	5.45455	0.0588928	C3, VEGFA, ANXA2	53	127	16792	7.48418	1	0.666491	61.6494
KEGG_PATHWAY	hsa01230:Biosynthesis of amino acids	3	5.45455	0.0596387	ARG1, MAT1A, CPS1	39	72	6879	7.34936	0.999901	0.418747	52.0162
GOTERM_BP_DIRECT	GO:0002052~positive regulation of neuroblast proliferation	2	3.63636	0.0601787	VEGFA, CTNNB1	53	20	16792	31.683	1	0.66805	62.4685
GOTERM_BP_DIRECT	GO:0048844~artery morphogenesis	2	3.63636	0.0630925	TGFBR1, VEGFA	53	21	16792	30.1743	1	0.679422	64.2643
GOTERM_CC_DIRECT	GO:0030863~cortical cytoskeleton	2	3.63636	0.0632354	ACTB, ACTN4	55	22	18224	30.1223	0.999957	0.411078	54.325
GOTERM_MF_DIRECT	GO:0035257~nuclear hormone receptor binding	2	3.63636	0.0668819	ACTN4, CTNNB1	54	22	16881	28.4192	1	0.707722	58.8559
GOTERM_CC_DIRECT	GO:0005737~cytoplasm	22	40	0.0677333	ACTB, IL6, ACTN4, PDLIM5, S100A11, SESN2, PNP, IL11, CTNNB1, ARG1, CCT5, DNAJB9, BAX, VEGFA, ERN1, FASN, RGN, CA3, GSTO1, NR5A2, PLS3, ALDH9A1	55	5222	18224	1.39594	0.99998	0.417281	56.8875
KEGG_PATHWAY	hsa05410:Hypertrophic cardiomyopathy (HCM)	3	5.45455	0.0686503	ACTB, IL6, IGF1	39	78	6879	6.78402	0.999977	0.447151	57.2284
GOTERM_BP_DIRECT	GO:0035924~cellular response to vascular endothelial growth factor stimulus	2	3.63636	0.0688936	VEGFA, ERN1	53	23	16792	27.5505	1	0.706115	67.6025
GOTERM_BP_DIRECT	GO:0001836~release of cytochrome c from mitochondria	2	3.63636	0.0688936	BAX, SOD2	53	23	16792	27.5505	1	0.706115	67.6025
GOTERM_BP_DIRECT	GO:0016239~positive regulation of macroautophagy	2	3.63636	0.0688936	HMOX1, SESN2	53	23	16792	27.5505	1	0.706115	67.6025
GOTERM_MF_DIRECT	GO:0020037~heme binding	3	5.45455	0.0689001	SUOX, PTGES2, HMOX1	54	137	16881	6.8455	1	0.69208	59.983
GOTERM_BP_DIRECT	GO:0008360~regulation of cell shape	3	5.45455	0.0698433	IL6, CCL2, VEGFA	53	140	16792	6.78922	1	0.705071	68.1204
GOTERM_BP_DIRECT	GO:0051602~response to electrical stimulus	2	3.63636	0.0717809	IL6, SOD2	53	24	16792	26.4025	1	0.709238	69.153
GOTERM_BP_DIRECT	GO:0071353~cellular response to interleukin-4	2	3.63636	0.0717809	ARG1, FASN	53	24	16792	26.4025	1	0.709238	69.153
GOTERM_CC_DIRECT	GO:0005759~mitochondrial matrix	4	7.27273	0.0727289	SUOX, ECHS1, CPS1, SOD2	55	327	18224	4.05316	0.999991	0.425201	59.5786
GOTERM_BP_DIRECT	GO:0046686~response to cadmium ion	2	3.63636	0.0746595	ARG1, SOD2	53	25	16792	25.3464	1	0.717948	70.6293
GOTERM_BP_DIRECT	GO:0060135~maternal process involved in female pregnancy	2	3.63636	0.0746595	ARG1, CCL2	53	25	16792	25.3464	1	0.717948	70.6293
KEGG_PATHWAY	hsa05132:Salmonella infection	3	5.45455	0.0764829	ACTB, CXCL1, IL6	39	83	6879	6.37535	0.999993	0.466423	61.3317
GOTERM_BP_DIRECT	GO:0002053~positive regulation of mesenchymal cell proliferation	2	3.63636	0.0775293	VEGFA, CTNNB1	53	26	16792	24.3716	1	0.726129	72.035
GOTERM_MF_DIRECT	GO:0001968~fibronectin binding	2	3.63636	0.0785616	VEGFA, CCDC80	54	26	16881	24.047	1	0.716351	64.9952
GOTERM_BP_DIRECT	GO:0051281~positive regulation of release of sequestered calcium ion into cytosol	2	3.63636	0.0803903	F2RL3, BAX	53	27	16792	23.4689	1	0.733825	73.3735
GOTERM_BP_DIRECT	GO:0042104~positive regulation of activated T cell proliferation	2	3.63636	0.0803903	HMGB1, IGF1	53	27	16792	23.4689	1	0.733825	73.3735
GOTERM_BP_DIRECT	GO:0045944~positive regulation of transcription from RNA polymerase II promoter	7	12.7273	0.0813231	HMGB1, IL6, VEGFA, IGF1, NR5A2, CTNNB1, IL11	53	981	16792	2.26077	1	0.732517	73.7968
GOTERM_MF_DIRECT	GO:0042056~chemoattractant activity	2	3.63636	0.081459	HMGB1, VEGFA	54	27	16881	23.1564	1	0.706752	66.3814
GOTERM_BP_DIRECT	GO:0051881~regulation of mitochondrial membrane potential	2	3.63636	0.0832427	BAX, SOD2	53	28	16792	22.6307	1	0.735636	74.6481
GOTERM_BP_DIRECT	GO:0001569~patterning of blood vessels	2	3.63636	0.0832427	VEGFA, CTNNB1	53	28	16792	22.6307	1	0.735636	74.6481
GOTERM_BP_DIRECT	GO:0043388~positive regulation of DNA binding	2	3.63636	0.0832427	HMGB1, IGF1	53	28	16792	22.6307	1	0.735636	74.6481
GOTERM_BP_DIRECT	GO:0045909~positive regulation of vasodilation	2	3.63636	0.0860864	HMOX1, CPS1	53	29	16792	21.8504	1	0.742596	75.8617
GOTERM_BP_DIRECT	GO:0097421~liver regeneration	2	3.63636	0.0860864	HMOX1, RGN	53	29	16792	21.8504	1	0.742596	75.8617
GOTERM_BP_DIRECT	GO:0044344~cellular response to fibroblast growth factor stimulus	2	3.63636	0.0889214	CCL2, CPS1	53	30	16792	21.122	1	0.749173	77.0172
GOTERM_BP_DIRECT	GO:0006730~one-carbon metabolic process	2	3.63636	0.0889214	MAT1A, CA3	53	30	16792	21.122	1	0.749173	77.0172
GOTERM_BP_DIRECT	GO:0055072~iron ion homeostasis	2	3.63636	0.0889214	HMOX1, SOD2	53	30	16792	21.122	1	0.749173	77.0172
GOTERM_BP_DIRECT	GO:0098656~anion transmembrane transport	2	3.63636	0.0889214	ABCC1, ABCC2	53	30	16792	21.122	1	0.749173	77.0172
GOTERM_BP_DIRECT	GO:0051017~actin filament bundle assembly	2	3.63636	0.0889214	ACTN4, PLS3	53	30	16792	21.122	1	0.749173	77.0172
GOTERM_MF_DIRECT	GO:0008201~heparin binding	3	5.45455	0.0899457	CCL2, VEGFA, CCDC80	54	160	16881	5.86146	1	0.722159	70.1556
KEGG_PATHWAY	hsa00910:Nitrogen metabolism	2	3.63636	0.0899715	CA3, CPS1	39	17	6879	20.7511	0.999999	0.506925	67.5624
GOTERM_BP_DIRECT	GO:0032496~response to lipopolysaccharide	3	5.45455	0.0916148	CXCL1, CPS1, SOD2	53	164	16792	5.79567	1	0.754872	78.0669
GOTERM_BP_DIRECT	GO:0048147~negative regulation of fibroblast proliferation	2	3.63636	0.0917478	BAX, SOD2	53	31	16792	20.4407	1	0.750354	78.1175
GOTERM_CC_DIRECT	GO:0005911~cell-cell junction	3	5.45455	0.092202	ACTN4, ANXA2, CTNNB1	55	172	18224	5.77928	1	0.491929	68.6644
GOTERM_MF_DIRECT	GO:0005524~ATP binding	9	16.3636	0.0932257	ACTB, CCT5, MAT1A, TGFBR1, ERN1, ABCC1, ABCB1, ABCC2, CPS1	54	1495	16881	1.88194	1	0.715178	71.5066
GOTERM_BP_DIRECT	GO:0032212~positive regulation of telomere maintenance via telomerase	2	3.63636	0.0945656	CCT5, CTNNB1	53	32	16792	19.8019	1	0.756357	79.1652
GOTERM_BP_DIRECT	GO:0046677~response to antibiotic	2	3.63636	0.0945656	IL6, CCL2	53	32	16792	19.8019	1	0.756357	79.1652
GOTERM_BP_DIRECT	GO:0008152~metabolic process	3	5.45455	0.0954179	ECHDC1, FASN, GSTO1	53	168	16792	5.65768	1	0.754722	79.4728
GOTERM_MF_DIRECT	GO:0016829~lyase activity	2	3.63636	0.0958126	HMGB1, PTGES2	54	32	16881	19.5382	1	0.706103	72.532
KEGG_PATHWAY	hsa05205:Proteoglycans in cancer	4	7.27273	0.097333	ACTB, VEGFA, IGF1, CTNNB1	39	200	6879	3.52769	1	0.518784	70.5609
GOTERM_BP_DIRECT	GO:0010718~positive regulation of epithelial to mesenchymal transition	2	3.63636	0.0973748	TGFBR1, CTNNB1	53	33	16792	19.2018	1	0.757262	80.1628
GOTERM_BP_DIRECT	GO:0070059~intrinsic apoptotic signaling pathway in response to endoplasmic reticulum stress	2	3.63636	0.0973748	BAX, ERN1	53	33	16792	19.2018	1	0.757262	80.1628
GOTERM_MF_DIRECT	GO:0030544~Hsp70 protein binding	2	3.63636	0.0986568	BAX, ERN1	54	33	16881	18.9461	1	0.698712	73.6201

## Sheet: targets of downregulated miRNA
Common elements in List 1 List 2 :
NOTCH1
E2F1
VEGFA
MTPN
DHFR
ACTN4
CAP1
GANAB
ABCC1
CCT5
SESN2
CANX
HRH2
EIF4EBP2
TMED7
JUND
MAP1LC3B
DBT
SOD2
SLPI
SERPING1
TTR
HMGB1
FADS1
GRK4
CYP2B6
LRAT
GSTM3
BPNT1
C3
WASL
USP5
ERN1
HLA-B
CKB
TMEM38B

## Sheet: enrichment analysis of down
Category	Term	Count	%	PValue	Genes	List Total	Pop Hits	Pop Total	Fold Enrichment	Bonferroni	Benjamini	FDR
GOTERM_BP_DIRECT	GO:0035924~cellular response to vascular endothelial growth factor stimulus	3	8.33333	0.00103883	NOTCH1, VEGFA, ERN1	36	23	16792	60.8406	0.474482	0.474482	1.5298
GOTERM_BP_DIRECT	GO:0003169~coronary vein morphogenesis	2	5.55556	0.00416443	NOTCH1, VEGFA	36	2	16792	466.444	0.924465	0.725165	6.00202
GOTERM_BP_DIRECT	GO:0032496~response to lipopolysaccharide	4	11.1111	0.00475998	NOTCH1, JUND, SLPI, SOD2	36	164	16792	11.3767	0.947841	0.62637	6.83237
GOTERM_BP_DIRECT	GO:0007568~aging	4	11.1111	0.00484126	FADS1, JUND, SERPING1, CANX	36	165	16792	11.3077	0.950412	0.528107	6.94515
GOTERM_BP_DIRECT	GO:0060948~cardiac vascular smooth muscle cell development	2	5.55556	0.00624032	NOTCH1, VEGFA	36	3	16792	310.963	0.979243	0.539284	8.8668
GOTERM_BP_DIRECT	GO:0035900~response to isolation stress	2	5.55556	0.00831201	FADS1, SOD2	36	4	16792	233.222	0.994296	0.577306	11.6444
GOTERM_BP_DIRECT	GO:0061419~positive regulation of transcription from RNA polymerase II promoter in response to hypoxia	2	5.55556	0.00831201	NOTCH1, VEGFA	36	4	16792	233.222	0.994296	0.577306	11.6444
GOTERM_BP_DIRECT	GO:0030324~lung development	3	8.33333	0.010921	HMGB1, NOTCH1, VEGFA	36	76	16792	18.4123	0.998883	0.62131	15.0301
GOTERM_BP_DIRECT	GO:0006955~immune response	5	13.8889	0.0110371	NOTCH1, HRH2, C3, SLPI, HLA-B	36	421	16792	5.53972	0.998961	0.576305	15.178
GOTERM_BP_DIRECT	GO:0060982~coronary artery morphogenesis	2	5.55556	0.0145019	NOTCH1, VEGFA	36	7	16792	133.27	0.999882	0.633851	19.4805
GOTERM_BP_DIRECT	GO:0030050~vesicle transport along actin filament	2	5.55556	0.0145019	ACTN4, WASL	36	7	16792	133.27	0.999882	0.633851	19.4805
GOTERM_BP_DIRECT	GO:0035148~tube formation	2	5.55556	0.0165569	NOTCH1, VEGFA	36	8	16792	116.611	0.999968	0.644223	21.9353
GOTERM_BP_DIRECT	GO:0035767~endothelial cell chemotaxis	2	5.55556	0.0186077	HMGB1, VEGFA	36	9	16792	103.654	0.999991	0.652493	24.3153
GOTERM_BP_DIRECT	GO:0002576~platelet degranulation	3	8.33333	0.0194363	ACTN4, VEGFA, SERPING1	36	103	16792	13.5858	0.999995	0.636676	25.2576
GOTERM_BP_DIRECT	GO:0051272~positive regulation of cellular component movement	2	5.55556	0.0206543	ACTN4, VEGFA	36	10	16792	93.2889	0.999998	0.629819	26.6229
GOTERM_BP_DIRECT	GO:0008154~actin polymerization or depolymerization	2	5.55556	0.0247352	CAP1, WASL	36	12	16792	77.7407	1	0.669583	31.0295
GOTERM_BP_DIRECT	GO:0010951~negative regulation of endopeptidase activity	3	8.33333	0.0262441	C3, SLPI, SERPING1	36	121	16792	11.5647	1	0.666286	32.5955
GOTERM_BP_DIRECT	GO:1901224~positive regulation of NIK/NF-kappaB signaling	2	5.55556	0.0287995	HMGB1, ACTN4	36	14	16792	66.6349	1	0.677141	35.172
GOTERM_BP_DIRECT	GO:0002437~inflammatory response to antigenic stimulus	2	5.55556	0.0308255	HMGB1, NOTCH1	36	15	16792	62.1926	1	0.680205	37.1492
GOTERM_BP_DIRECT	GO:0006914~autophagy	3	8.33333	0.0312437	HMGB1, MAP1LC3B, SESN2	36	133	16792	10.5213	1	0.664314	37.5503
GOTERM_BP_DIRECT	GO:0001935~endothelial cell proliferation	2	5.55556	0.0368788	HMGB1, ERN1	36	18	16792	51.8272	1	0.706004	42.7268
GOTERM_BP_DIRECT	GO:0002052~positive regulation of neuroblast proliferation	2	5.55556	0.040894	NOTCH1, VEGFA	36	20	16792	46.6444	1	0.725355	46.1679
GOTERM_BP_DIRECT	GO:0048754~branching morphogenesis of an epithelial tube	2	5.55556	0.0468863	NOTCH1, VEGFA	36	23	16792	40.5604	1	0.75719	50.9466
GOTERM_BP_DIRECT	GO:0001666~response to hypoxia	3	8.33333	0.0497817	ACTN4, VEGFA, SOD2	36	172	16792	8.13566	1	0.762299	53.111
GOTERM_BP_DIRECT	GO:0006457~protein folding	3	8.33333	0.0539778	CCT5, GANAB, CANX	36	180	16792	7.77407	1	0.775389	56.0901
GOTERM_BP_DIRECT	GO:0030335~positive regulation of cell migration	3	8.33333	0.0561219	NOTCH1, ACTN4, VEGFA	36	184	16792	7.60507	1	0.774555	57.5433
GOTERM_BP_DIRECT	GO:0045087~innate immune response	4	11.1111	0.0596858	HMGB1, SLPI, SERPING1, HLA-B	36	430	16792	4.33902	1	0.782109	59.8599
GOTERM_BP_DIRECT	GO:0042572~retinol metabolic process	2	5.55556	0.0607271	TTR, LRAT	36	30	16792	31.0963	1	0.774973	60.5142
GOTERM_BP_DIRECT	GO:0002474~antigen processing and presentation of peptide antigen via MHC class I	2	5.55556	0.0607271	HLA-B, CANX	36	30	16792	31.0963	1	0.774973	60.5142
GOTERM_BP_DIRECT	GO:0000122~negative regulation of transcription from RNA polymerase II promoter	5	13.8889	0.0613794	E2F1, HMGB1, NOTCH1, JUND, VEGFA	36	720	16792	3.2392	1	0.76595	60.919
GOTERM_BP_DIRECT	GO:0006357~regulation of transcription from RNA polymerase II promoter	4	11.1111	0.0634157	HMGB1, JUND, VEGFA, SOD2	36	441	16792	4.23079	1	0.765046	62.1578
GOTERM_BP_DIRECT	GO:0048167~regulation of synaptic plasticity	2	5.55556	0.0646456	EIF4EBP2, HRH2	36	32	16792	29.1528	1	0.759845	62.8882
GOTERM_BP_DIRECT	GO:0050918~positive chemotaxis	2	5.55556	0.0704937	HMGB1, VEGFA	36	35	16792	26.654	1	0.778721	66.1849
GOTERM_BP_DIRECT	GO:1901998~toxin transport	2	5.55556	0.0724351	CCT5, HRH2	36	36	16792	25.9136	1	0.777188	67.2175
GOTERM_BP_DIRECT	GO:0045599~negative regulation of fat cell differentiation	2	5.55556	0.0840013	E2F1, SOD2	36	42	16792	22.2116	1	0.816809	72.7846
GOTERM_BP_DIRECT	GO:0032147~activation of protein kinase activity	2	5.55556	0.0897317	HMGB1, VEGFA	36	45	16792	20.7309	1	0.828558	75.2035
GOTERM_BP_DIRECT	GO:0030900~forebrain development	2	5.55556	0.0916341	E2F1, NOTCH1	36	46	16792	20.2802	1	0.826179	75.9611
GOTERM_BP_DIRECT	GO:0008630~intrinsic apoptotic signaling pathway in response to DNA damage	2	5.55556	0.0935326	E2F1, SOD2	36	47	16792	19.8487	1	0.823907	76.6957
GOTERM_BP_DIRECT	GO:0006749~glutathione metabolic process	2	5.55556	0.110447	GSTM3, SOD2	36	56	16792	16.6587	1	0.866328	82.376
GOTERM_BP_DIRECT	GO:0050679~positive regulation of epithelial cell proliferation	2	5.55556	0.117866	NOTCH1, VEGFA	36	60	16792	15.5481	1	0.877309	84.4347
GOTERM_BP_DIRECT	GO:0001523~retinoid metabolic process	2	5.55556	0.119711	TTR, LRAT	36	61	16792	15.2933	1	0.874693	84.9107
GOTERM_BP_DIRECT	GO:0007613~memory	2	5.55556	0.121552	EIF4EBP2, HRH2	36	62	16792	15.0466	1	0.872159	85.3721
GOTERM_BP_DIRECT	GO:0055114~oxidation-reduction process	4	11.1111	0.12466	DHFR, CYP2B6, FADS1, SOD2	36	592	16792	3.15165	1	0.872595	86.1212
GOTERM_BP_DIRECT	GO:0032868~response to insulin	2	5.55556	0.130704	FADS1, SESN2	36	67	16792	13.9237	1	0.879335	87.4766
GOTERM_BP_DIRECT	GO:0042493~response to drug	3	8.33333	0.131816	JUND, ABCC1, SOD2	36	304	16792	4.60307	1	0.875475	87.7121
GOTERM_BP_DIRECT	GO:0001889~liver development	2	5.55556	0.14336	NOTCH1, SOD2	36	74	16792	12.6066	1	0.892203	89.925
GOTERM_BP_DIRECT	GO:0045944~positive regulation of transcription from RNA polymerase II promoter	5	13.8889	0.1454	E2F1, HMGB1, NOTCH1, JUND, VEGFA	36	981	16792	2.37739	1	0.890345	90.275
GOTERM_BP_DIRECT	GO:0006810~transport	3	8.33333	0.163519	TTR, TMED7, ABCC1	36	348	16792	4.02107	1	0.914229	92.923
GOTERM_BP_DIRECT	GO:0071456~cellular response to hypoxia	2	5.55556	0.181984	E2F1, VEGFA	36	96	16792	9.71759	1	0.933	94.9177
GOTERM_BP_DIRECT	GO:0006958~complement activation, classical pathway	2	5.55556	0.187118	C3, SERPING1	36	99	16792	9.42312	1	0.934681	95.3708
GOTERM_CC_DIRECT	GO:0070062~extracellular exosome	18	50	4.17437e-06	GANAB, ACTN4, C3, SERPING1, HLA-B, CANX, SOD2, CKB, TMED7, TTR, CCT5, GSTM3, MTPN, SLPI, ABCC1, WASL, CAP1, BPNT1	36	2811	18224	3.24155	0.000471594	0.000471594	0.0047396
GOTERM_CC_DIRECT	GO:0043209~myelin sheath	4	11.1111	0.0030617	CCT5, CANX, SOD2, CKB	36	152	18224	13.3216	0.292844	0.159074	3.42177
GOTERM_CC_DIRECT	GO:0031093~platelet alpha granule lumen	3	8.33333	0.0049921	ACTN4, VEGFA, SERPING1	36	55	18224	27.6121	0.431935	0.171805	5.52394
GOTERM_CC_DIRECT	GO:0005789~endoplasmic reticulum membrane	7	19.4444	0.00551055	TMED7, NOTCH1, LRAT, CYP2B6, FADS1, ERN1, CANX	36	862	18224	4.11085	0.464425	0.144529	6.08137
GOTERM_CC_DIRECT	GO:0005739~mitochondrion	8	22.2222	0.0120177	E2F1, DBT, MAP1LC3B, FADS1, ERN1, SESN2, SOD2, CKB	36	1331	18224	3.04266	0.744932	0.239094	12.8273
GOTERM_CC_DIRECT	GO:0005615~extracellular space	8	22.2222	0.0127821	HMGB1, TTR, ACTN4, C3, VEGFA, SLPI, SERPING1, CKB	36	1347	18224	3.00652	0.766294	0.215165	13.5901
GOTERM_CC_DIRECT	GO:0071556~integral component of lumenal side of endoplasmic reticulum membrane	2	5.55556	0.0542644	HLA-B, CANX	36	29	18224	34.9119	0.998172	0.593693	46.9259
GOTERM_CC_DIRECT	GO:0042645~mitochondrial nucleoid	2	5.55556	0.0829674	DBT, SOD2	36	45	18224	22.4988	0.999944	0.705772	62.5971
GOTERM_CC_DIRECT	GO:0005576~extracellular region	7	19.4444	0.083732	HMGB1, TTR, NOTCH1, ACTN4, C3, VEGFA, SERPING1	36	1610	18224	2.20097	0.999949	0.666442	62.9496
GOTERM_CC_DIRECT	GO:0009986~cell surface	4	11.1111	0.0849968	HMGB1, NOTCH1, VEGFA, HLA-B	36	542	18224	3.73596	0.999956	0.633499	63.5262
GOTERM_CC_DIRECT	GO:0005829~cytosol	11	30.5556	0.0894219	GSTM3, CCT5, NOTCH1, DHFR, MAP1LC3B, MTPN, GRK4, WASL, SESN2, BPNT1, CKB	36	3315	18224	1.67977	0.999975	0.617988	65.4796
GOTERM_CC_DIRECT	GO:0005791~rough endoplasmic reticulum	2	5.55556	0.0935114	LRAT, CANX	36	51	18224	19.8519	0.999985	0.60327	67.1996
GOTERM_CC_DIRECT	GO:0031012~extracellular matrix	3	8.33333	0.110342	GANAB, SLPI, CANX	36	296	18224	5.13063	0.999998	0.638066	73.4868
GOTERM_CC_DIRECT	GO:0005793~endoplasmic reticulum-Golgi intermediate compartment	2	5.55556	0.12275	HMGB1, TMED7	36	68	18224	14.8889	1	0.652526	77.395
GOTERM_CC_DIRECT	GO:0031090~organelle membrane	2	5.55556	0.154345	CYP2B6, MAP1LC3B	36	87	18224	11.6373	1	0.717173	85.0951
GOTERM_CC_DIRECT	GO:0042470~melanosome	2	5.55556	0.176916	GANAB, CANX	36	101	18224	10.0242	1	0.747172	89.037
GOTERM_CC_DIRECT	GO:0043234~protein complex	3	8.33333	0.18711	TTR, ACTN4, CANX	36	412	18224	3.68608	1	0.747665	90.4835
GOTERM_MF_DIRECT	GO:0019899~enzyme binding	5	13.8889	0.00432401	GSTM3, NOTCH1, JUND, ERN1, SLPI	35	333	16881	7.24196	0.489148	0.489148	5.07103
GOTERM_MF_DIRECT	GO:0005161~platelet-derived growth factor receptor binding	2	5.55556	0.0298014	VEGFA, ERN1	35	15	16881	64.3086	0.990808	0.904126	30.4648
GOTERM_MF_DIRECT	GO:0042056~chemoattractant activity	2	5.55556	0.0530202	HMGB1, VEGFA	35	27	16881	35.727	0.999785	0.940076	48.0163
GOTERM_MF_DIRECT	GO:0042802~identical protein binding	5	13.8889	0.0622136	TTR, GSTM3, VEGFA, ERN1, SOD2	35	749	16881	3.21972	0.999953	0.91701	53.7634
GOTERM_MF_DIRECT	GO:0016746~transferase activity, transferring acyl groups	2	5.55556	0.0756993	DBT, LRAT	35	39	16881	24.7341	0.999995	0.912861	61.1457
GOTERM_MF_DIRECT	GO:0004866~endopeptidase inhibitor activity	2	5.55556	0.0775652	C3, SLPI	35	40	16881	24.1157	0.999996	0.875786	62.0773
GOTERM_MF_DIRECT	GO:0043565~sequence-specific DNA binding	4	11.1111	0.0853505	E2F1, NOTCH1, MTPN, JUND	35	518	16881	3.72443	0.999999	0.861302	65.7474
GOTERM_MF_DIRECT	GO:0019825~oxygen binding	2	5.55556	0.0905248	CYP2B6, SOD2	35	47	16881	20.524	1	0.840936	68.0034
GOTERM_MF_DIRECT	GO:0003779~actin binding	3	8.33333	0.107554	ACTN4, CAP1, WASL	35	278	16881	5.20483	1	0.859101	74.5013
GOTERM_MF_DIRECT	GO:0031490~chromatin DNA binding	2	5.55556	0.110534	NOTCH1, ACTN4	35	58	16881	16.6315	1	0.837255	75.505
GOTERM_MF_DIRECT	GO:0008134~transcription factor binding	3	8.33333	0.111436	E2F1, HMGB1, JUND	35	284	16881	5.09487	1	0.810776	75.8018
GOTERM_MF_DIRECT	GO:0031625~ubiquitin protein ligase binding	3	8.33333	0.113391	DBT, MAP1LC3B, CKB	35	287	16881	5.04161	1	0.788713	76.4335
GOTERM_MF_DIRECT	GO:0001047~core promoter binding	2	5.55556	0.121267	E2F1, NOTCH1	35	64	16881	15.0723	1	0.785907	78.8282
GOTERM_MF_DIRECT	GO:0004867~serine-type endopeptidase inhibitor activity	2	5.55556	0.178089	SLPI, SERPING1	35	97	16881	9.94462	1	0.885978	90.5137
GOTERM_MF_DIRECT	GO:0042803~protein homodimerization activity	4	11.1111	0.180594	GSTM3, ACTN4, VEGFA, ERN1	35	730	16881	2.64282	1	0.87231	90.8551
GOTERM_MF_DIRECT	GO:0051082~unfolded protein binding	2	5.55556	0.19948	CCT5, CANX	35	110	16881	8.76935	1	0.884145	93.0887
KEGG_PATHWAY	hsa04977:Vitamin digestion and absorption	2	5.55556	0.0800508	LRAT, ABCC1	27	22	6879	23.1616	0.999536	0.999536	59.8092
KEGG_PATHWAY	hsa05206:MicroRNAs in cancer	4	11.1111	0.0914824	E2F1, NOTCH1, VEGFA, ABCC1	27	286	6879	3.56333	0.999853	0.987885	64.9411
KEGG_PATHWAY	hsa04145:Phagosome	3	8.33333	0.109297	C3, HLA-B, CANX	27	150	6879	5.09556	0.999976	0.971261	71.7616
KEGG_PATHWAY	hsa04141:Protein processing in endoplasmic reticulum	3	8.33333	0.133021	GANAB, ERN1, CANX	27	169	6879	4.52268	0.999998	0.962486	78.9741
KEGG_PATHWAY	hsa05219:Bladder cancer	2	5.55556	0.144194	E2F1, VEGFA	27	41	6879	12.4282	0.999999	0.943023	81.7522
KEGG_PATHWAY	hsa05203:Viral carcinogenesis	3	8.33333	0.180752	ACTN4, C3, HLA-B	27	205	6879	3.72846	1	0.95297	88.6739
